# Supplementary material
Source: PubMed Central journal article supplement (PMC5034955)
Supplement: supp_jiw346_jiw346supp.pdf [file supp_jiw346_jiw346supp.pdf]

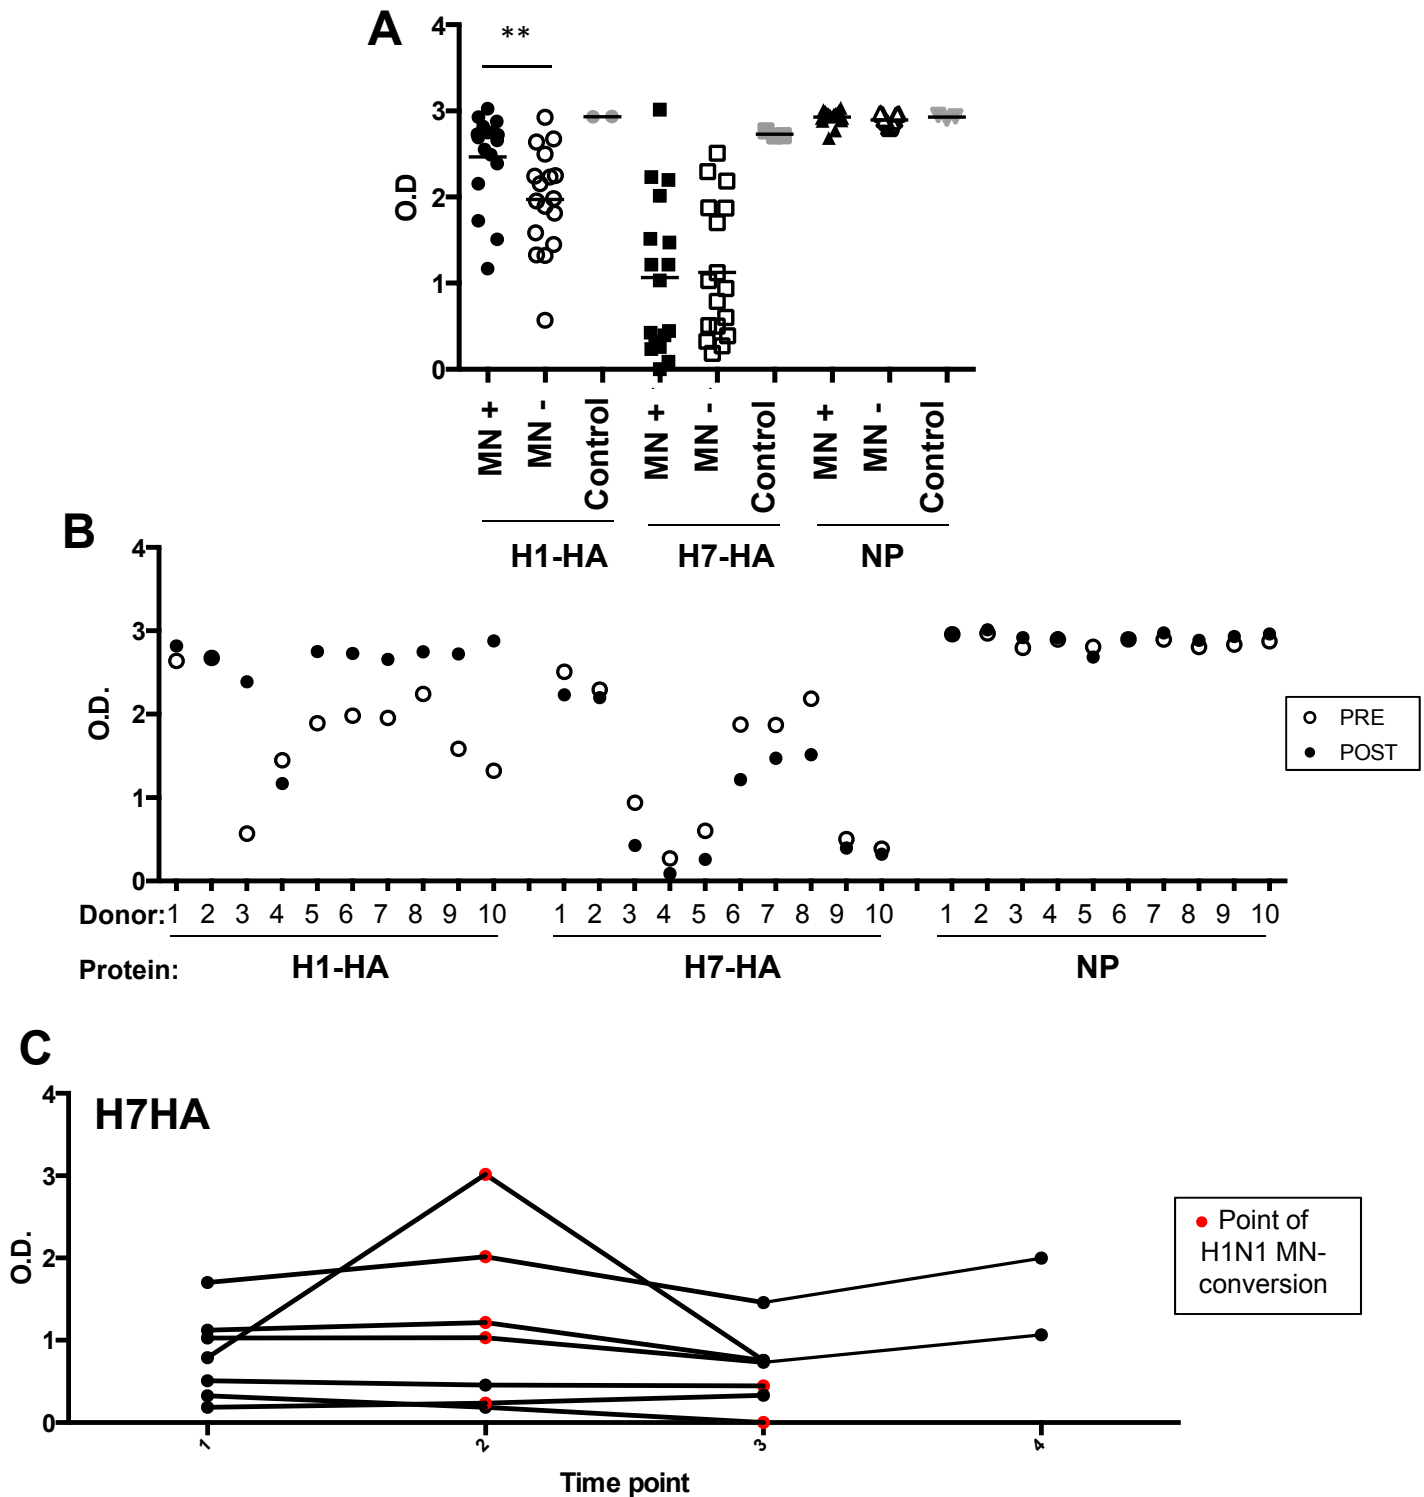

**Supplementary Figure 1: H1N1 seroconversion does not increase anti-influenza H7HA antibody by ELISA.** (A) H1N1 MN positive (n=17, black symbols), MN negative (n=15, white symbols) and pooled serum (post pandemic pooled n=4 healthy donors, grey symbols), were assessed for IgG1-antibodies towards the H1-HA, H7-HA and conserved NP protein (from Figure 1BC). (B) Paired sera from the same donor (n=10), at pre- and post-H1N1 exposure (confirmed H1N1 positive (MN >1:40, HAI >1:40)), was assessed for H1-HA, H7-HA and NP-specific IgG1-antibody responses. (C) Serial longitudinal serum of MN H1N1 positive donors from 3 (n=5) to 4 time-points (n=2), were tested for protein-specific antibody titres by standard IgG1 ELISA for NP. Red symbols indicate the point of H1N1 MN-sero conversion. Time points are the point of Red Cross blood donation 2-6 months between each time point, (median=4 months),

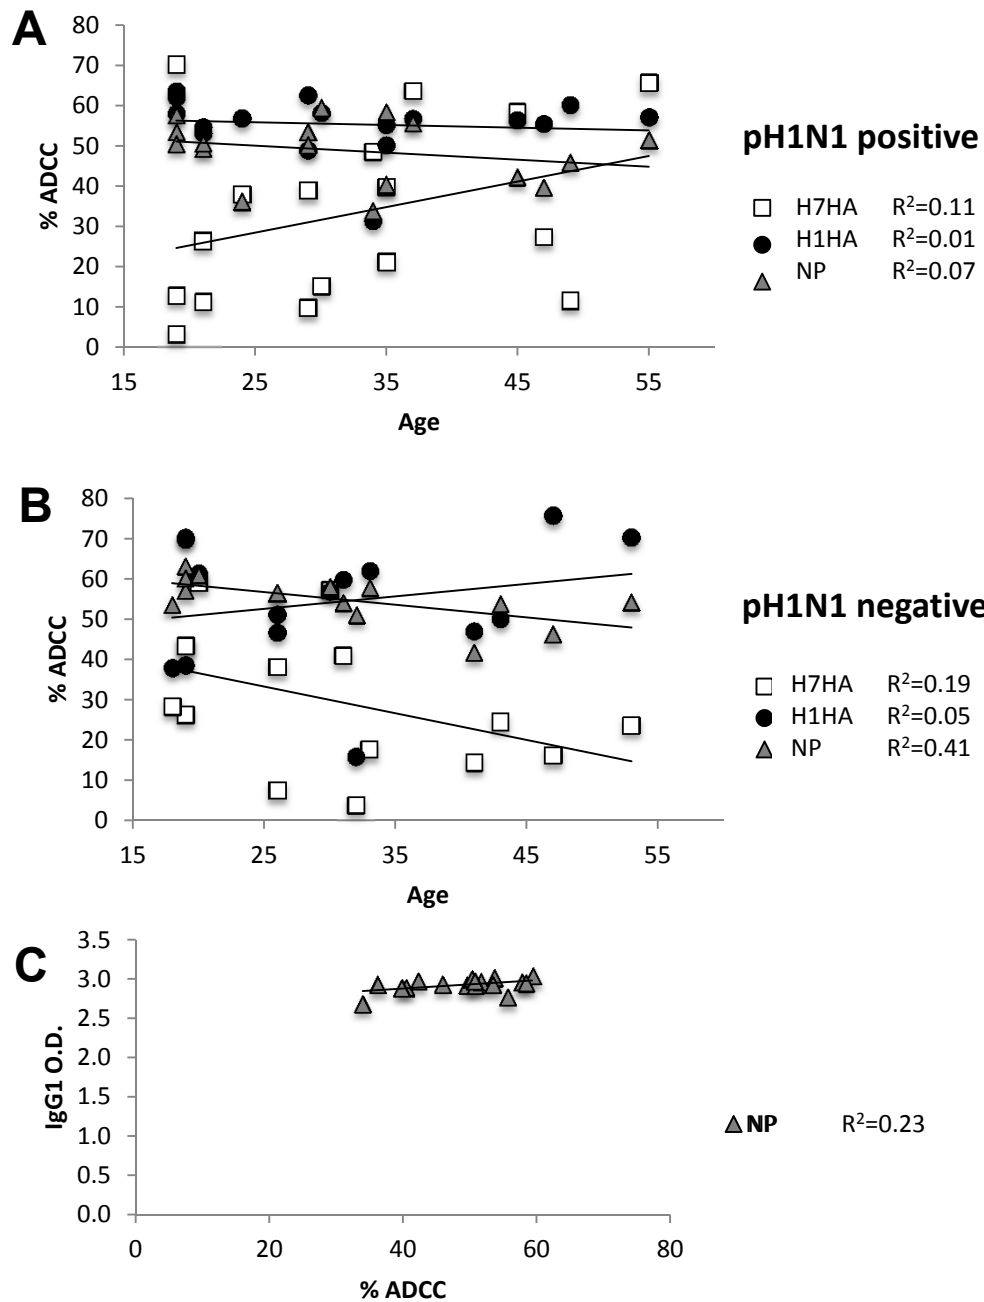

**Supplementary Figure 2: No correlation between ADCC responses and age or IgG antibody.** The correlation between ADCC response magnitude and donor age (from Figure 1B) for H1N1 positive donors (A) and H1N1 negative donors (B). The correlation between NP-specific ADCC response (from Figure 1B) and NP-specific IgG level (C) from H1N1-positive donors (from Supplementary 1A).
